# Supplementary material
Source: PubMed Central journal article supplement (PMC5351859)
Supplement: NIHMS71711-supplement-Supplementary_Materials.pdf [file NIHMS71711-supplement-Supplementary_Materials.pdf]

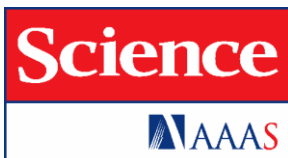

## Supplementary Materials for

### **Translational termination without a stop codon**

Nathan R. James, Alan Brown, Yuliya Gordiyenko, V. Ramakrishnan\*

\*Corresponding author. Email: ramak@mrc-lmb.cam.ac.uk

Published 1 December 2016 on *Science* First Release  
DOI: 10.1126/science.aai9127

**This PDF file includes:**

Materials and Methods  
Figs. S1 to S5  
Table S1  
References

## Materials and Methods

### ArfA purification

A pET16b vector encoding *E. coli* ArfA with a twelve-residue C-terminal truncation and a decahistidine N-terminal tag followed by a Factor Xa cleavage site was a kind gift from Dr. Yoshihiro Shimizu (RIKEN). The protein was expressed in *E. coli* BL21 (DE3) cells (Novagen) for 4 h at 37 °C after induction at OD<sub>600</sub> 0.5 with a final concentration of 1 mM IPTG. The cells were resuspended and lysed by sonication in lysis buffer (50 mM HEPES–KOH (pH 7.5), 1 M NH<sub>4</sub>Cl, 5 mM MgCl<sub>2</sub>, 40 mM imidazole and 6 mM 2-mercaptoethanol) and applied to a HisTrap column (GE Healthcare). The protein was eluted over a gradient up to 1 M imidazole before being dialyzed overnight against dialysis buffer (50 mM HEPES–KOH (pH 7.5), 50 mM KCl, 5 mM MgCl<sub>2</sub>, 2 mM CaCl<sub>2</sub> and 6 mM 2-mercaptoethanol) containing Factor Xa (NEB). Untagged ArfA was obtained by passing the solution through a HisTrap column. ArfA was purified further by size-exclusion chromatography with a Superdex 75 16/600 column (GE Healthcare) equilibrated with buffer G (5 mM HEPES–KOH (pH 7.4), 50 mM KCl, 10 mM NH<sub>4</sub>Cl, 10 mM Mg(OAc)<sub>2</sub> and 6 mM 2-mercaptoethanol). ArfA(A18T) was prepared following the same procedure.

### Sample preparation and electron cryomicroscopy

*E. coli* 70S ribosomes were purified as described previously (31). *T. thermophilus* RF2 (TtRF2) was purified as described (16). Dr. Ramanujan S. Hegde (MRC LMB) provided His-tagged *E. coli* RF2 from the PURE system (32). *E. coli* fMet-NH-tRNA<sup>fMet</sup> containing a nonhydrolyzable amide bond between A76 and the *N*-formylmethionine was prepared as described (33). A truncated version of Z4C mRNA (34) that ends immediately after the AUG start codon was chemically synthesized (GE Dharmacon).

Reaction mixtures of 500 µl were prepared in buffer G containing 130 nM *E. coli* 70S ribosomes. The mixtures were incubated for 5 min at 37 °C after addition of each of the following components: 520 nM mRNA, 1.3 µM fMet-NH-tRNA<sup>fMet</sup>, 1.3 µM wild-type ArfA, and either 1.3 µM RF2 or TtRF2. Additional reactions were prepared with 3.2 µM ArfA(A18T) and 1.3 µM RF2, and with 1.3 µM wild-type ArfA but lacking RF2. The mixtures were then held on ice before being frozen onto grids.

UltrAuFoil R 1.2/1.3 grids (for the complex with TtRF2) and QUANTIFOIL R 2/2 grids (for the other complexes) were coated with a continuous carbon film (~60 Å in thickness) and glow-discharged for 30 s at 6 V. Aliquots of 3 µl of reaction mixture were incubated on the grids for 30 s at 4 °C and 100% humidity. The grids were then blotted for 4 to 5 s and flash-frozen in liquid ethane using a Vitrobot Mark III (FEI).

Micrographs were collected using a Titan Krios microscope at 300 keV with a Falcon II detector and EPU software (all FEI). A dose rate of  $40 e\cdot\text{Å}^{-2}\cdot\text{s}^{-1}$  was used. The defocus values ranged from -2.0 to -3.0 µm, the exposures were 1.2 s with 20 movie frames and the calibrated magnification of 134,615× resulted in a pixel size of 1.04 Å.

### **Image processing**

The movie frames of each image were aligned using MotionCorr (35). Parameters of the contrast transfer function were obtained using Gctf (36) for each motion-corrected micrograph. All subsequent processing was performed in RELION-2.0 (37), except for the dataset with TtRF2, which was processed in RELION-1.4. Semiautonomous particle picking (38) was used to select ribosomes from the micrographs. Incorrectly selected nonribosomal particles were discarded after reference-free two-dimensional classification. A cryo-EM map of the 70S–RelA complex (EMD-8107) (31), low-pass-filtered to 40 Å, was used as an initial reference for the first three-dimensional refinement. An initial round of three-dimensional classification without further aligning the particles was used to discard empty 70S ribosomes, free 50S subunits and poorly aligned particles (Fig. S1). After another refinement, motion correction was performed for each particle using a running average of three movie frames and a standard deviation of one pixel for the translational alignment. In addition, each frame was weighted with a B-factor to compensate for radiation damage. After this “particle-polishing” step, focused classification with signal subtraction (FCwSS) (39) was used to isolate particles containing ArfA and RF2 (or an empty A site for the dataset without RF2). An additional three-dimensional classification without alignments and two rounds of FCwSS were performed on the dataset with TtRF2 to improve the quality of the map. For the other datasets, a final three-dimensional classification with local angular searching was performed as a final clean-up of the data. Despite multiple

rounds of classification, no ArfA was visible in the dataset without RF2. This dataset was used to model a nonstop complex with an unoccupied A site.

The final statistics for each dataset are given in Table S1. Reported resolutions are based on the Fourier-shell-correlation (FSC) 0.143 criterion (40). High-resolution noise substitution was used to correct for the effects of applying a mask during the FSC calculations (41). Before visualization, density maps were corrected for the modulation transfer function of the Falcon II detector and sharpened by applying a negative B-factor that was estimated using automated procedures (40). Local resolution was quantified using ResMap (42) (Fig. S2).

### **Model building**

Models of the *E. coli* 70S ribosome and fMet-tRNA<sup>fMet</sup> (31) were docked into the maps using Chimera (43) and each chain was subsequently rigid-body-fitted in Coot (44). All chains were manually adjusted to fit the density. The crystal structures of *E. coli* RF2 (PDB accession code 1GQE) (21) and TtRF2 (PDB accession code 2IHR) (23) were rigid-body-fitted into the A site and partially rebuilt to fit the densities. ArfA was built *de novo*.

### **Model refinement and validation**

Reciprocal-space refinement was carried out in REFMAC v5.8 optimized for cryo-EM maps using external restraints generated by ProSMART and LIBG (45). The fit of the model to the map density was quantified using FSC<sub>average</sub> (45) and CRef (40). CRef is a measure of the resolution when the FSC between the refined model and map is 0.5, and should closely agree with resolution of the map by the FSC=0.143 criterion (40). Model statistics were obtained using MolProbity (46) and provided in Table S1. Cross-validation against overfitting was performed as previously described (45) (Fig. S2A).

All figures were created using PyMOL (47) or Chimera (43).

## Supplementary Figures

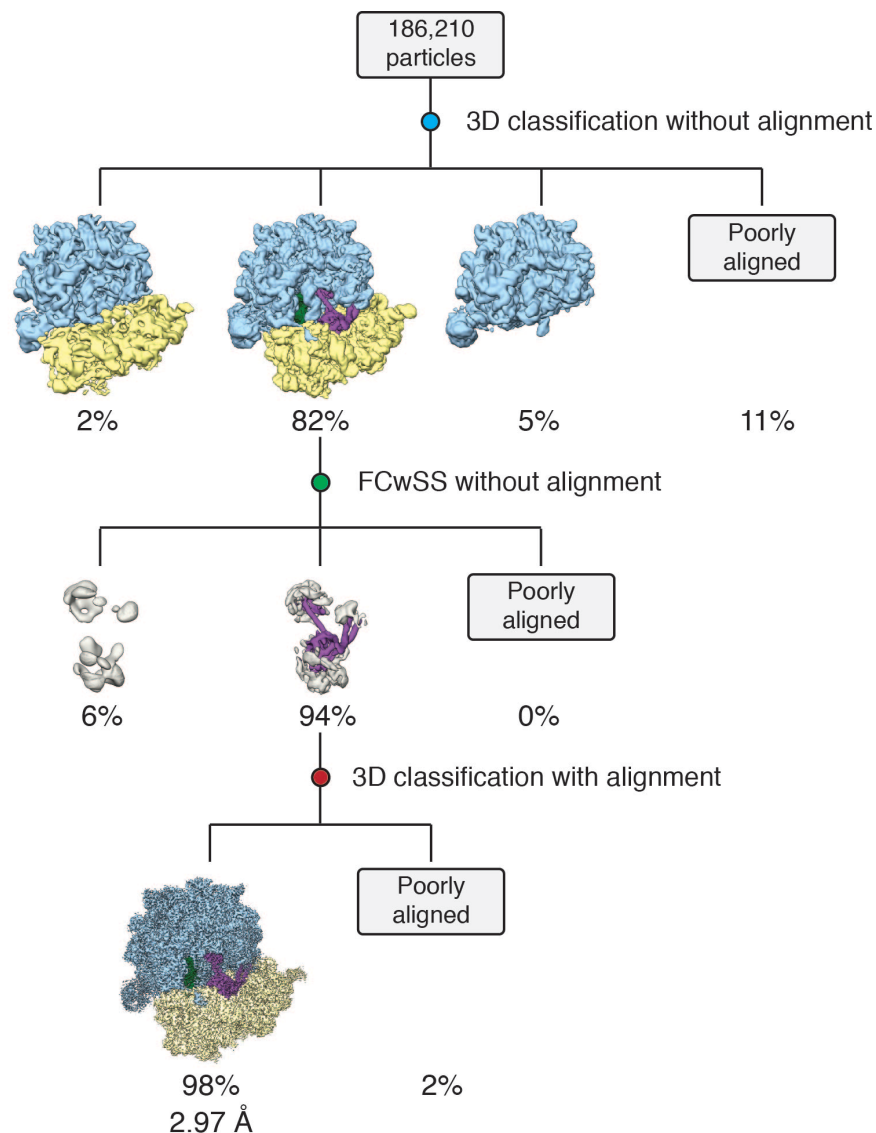

**Fig. S1. *In-silico* classification.** Three rounds of *in-silico* classification were used to isolate a single well-defined map for the nonstop complex recognized by wild-type ArfA and RF2. 186,210 particles selected from 2D classification were classified while preserving the Euler angles from a prior 3D refinement step. This separated nonstop complexes from empty ribosomes, isolated 50S subunits and poorly aligned particles. FCwSS using a mask over RF2 removed further empty ribosomes. A final 3D classification, this time allowing angular sampling, removed any remaining poorly aligning particles. The final reconstruction has a nominal resolution of 2.97 Å. All other datasets were classified similarly, with any changes to the scheme described in the methods.

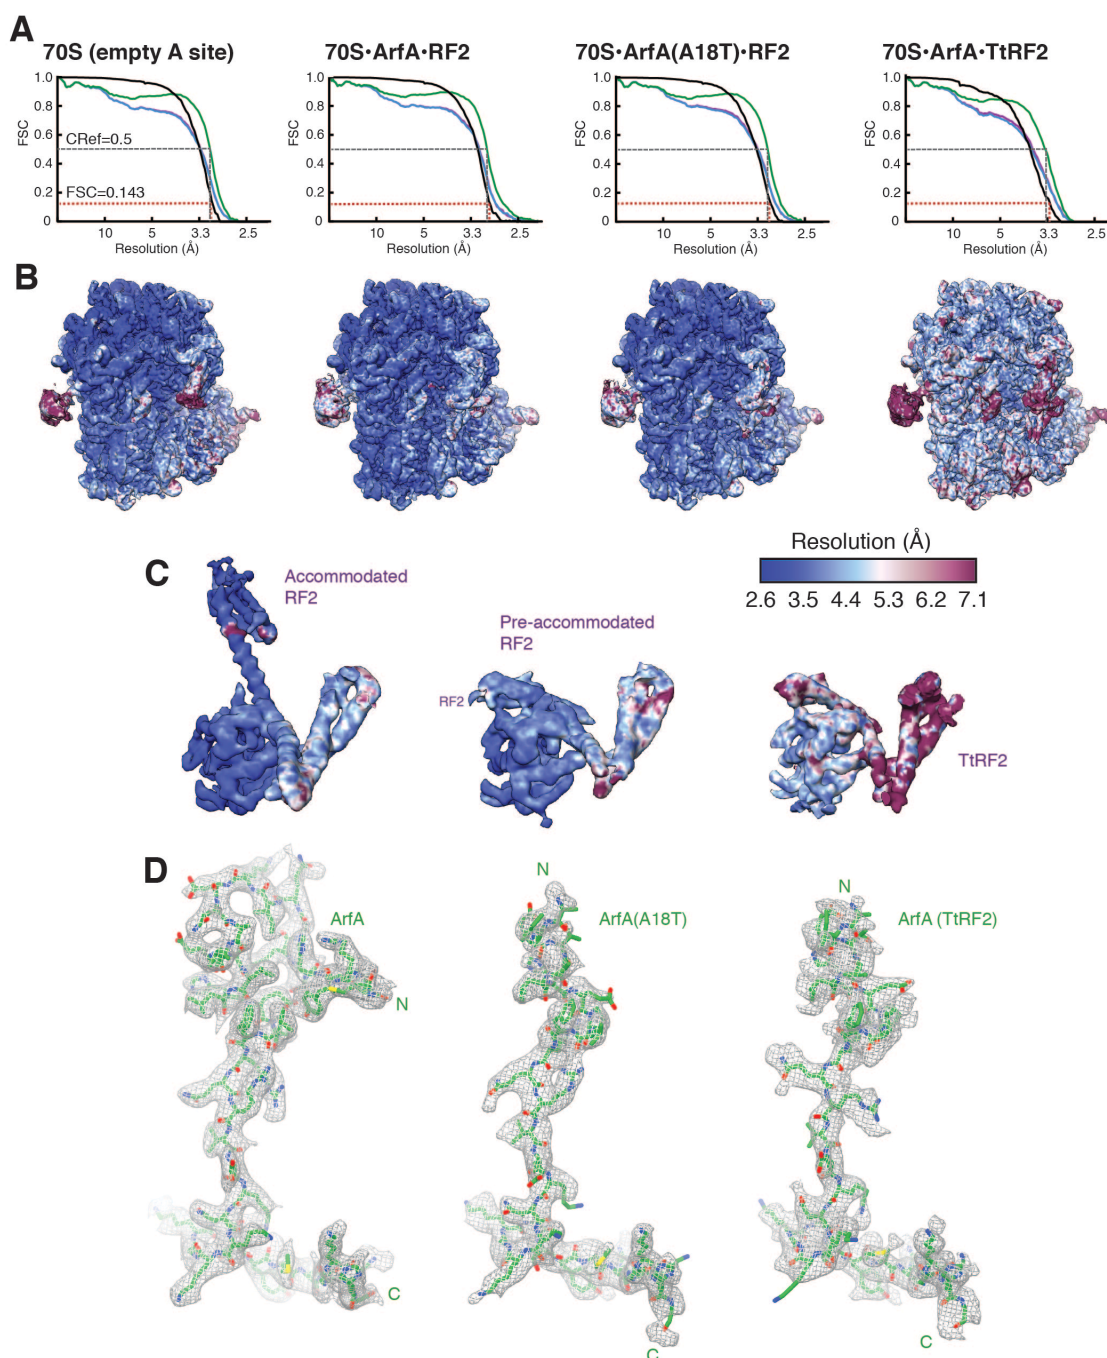

**Fig. S2. Quality of maps and models.** (A) Fourier-shell-correlation (FSC) curves for each reported cryo-EM reconstruction (black). The resolution at FSC=0.143 is indicated with a red dashed line. Also shown are FSC curves of the fit of the refined model to the final map (green) for each structure. The resolution at FSC=0.5 (CRef) is indicated with a grey dashed line. The self- and cross-validated correlations are shown in purple and blue, respectively. (B) The cryo-EM map for each complex is colored by local resolution. (C) Isolated density for RF2 and TtRF2 colored by local resolution for each complex. (D) Density and model for ArfA from each complex.

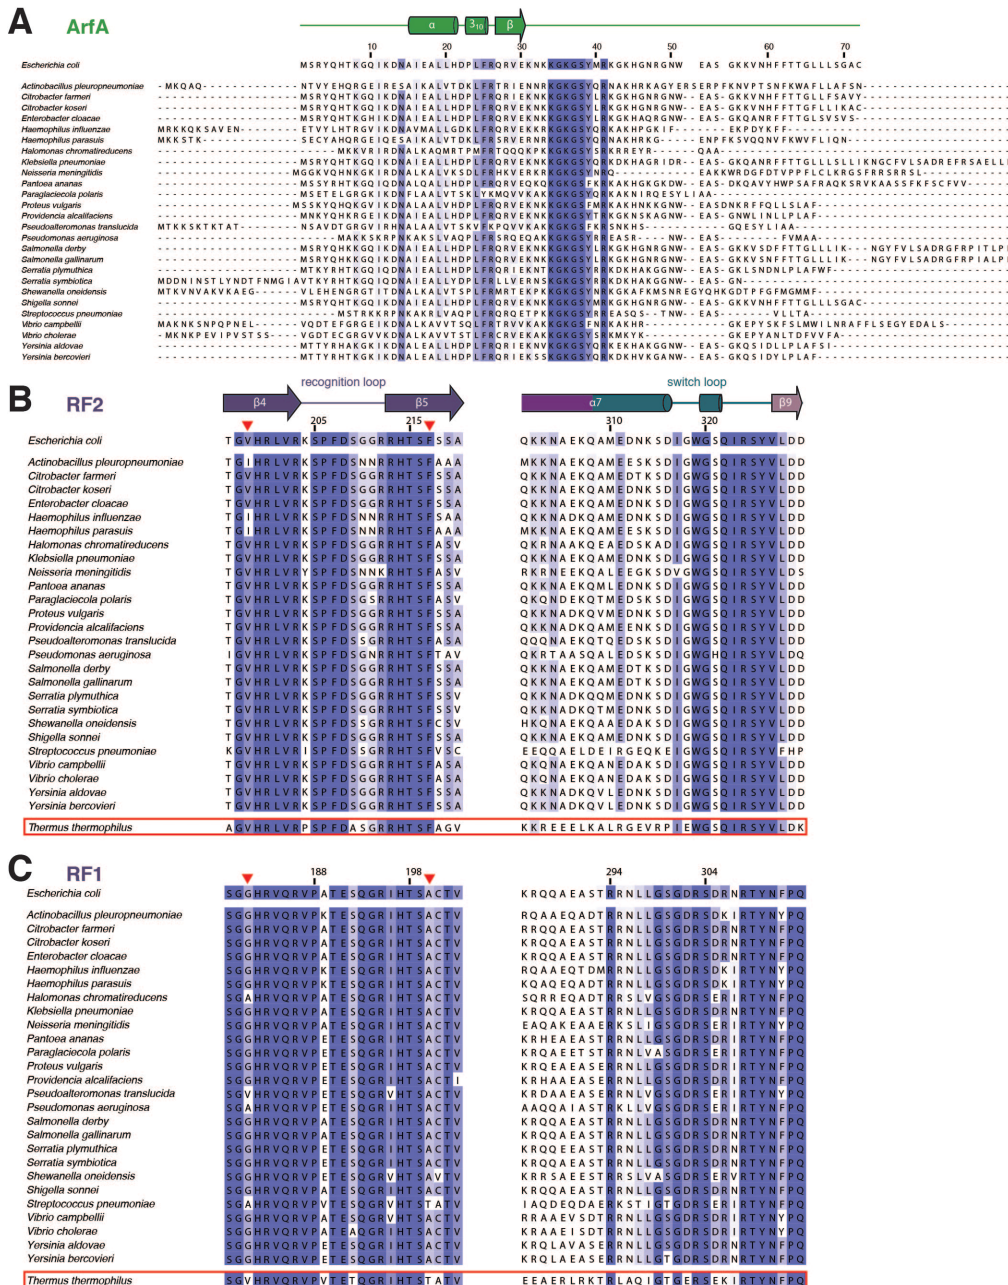

**Fig. S3. Sequence alignments.** (A) Alignment of selected ArfA sequences. Numbering and secondary structure corresponds to *E. coli* ArfA. (B) Alignment of the recognition and switch loops of RF2 from ArfA-containing species and from *T. thermophilus*, which lacks an ArfA ortholog. Numbering and secondary structure corresponds to *E. coli* RF2. Hydrophobic residues that confer specificity for ArfA are indicated with arrowheads. (C) Alignment of the recognition and switch loops of RF1. The numbering corresponds to *E. coli* RF1. All sequences were obtained from UniProt (48), aligned with MUSCLE (49) and visualized in Jalview (50). Residues are colored only when they agree with the consensus sequence and shaded according to the percentage of agreeing residues.

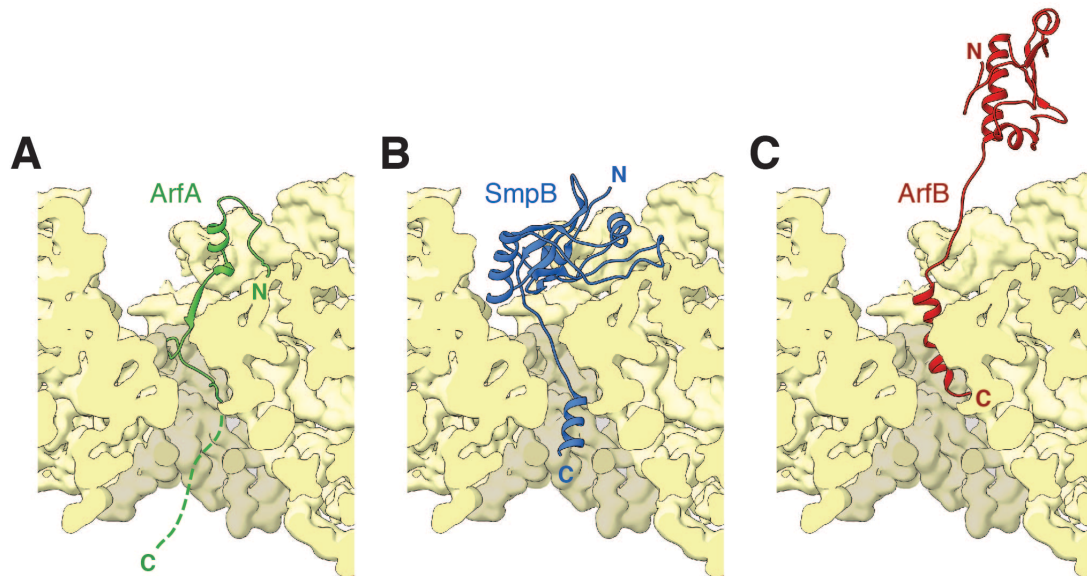

**Fig. S4. ArfA, SmpB and ArfB bind the mRNA entry channel through distinct C-termini.** (A) ArfA has an unstructured C-terminal tail that protrudes into the mRNA channel. (B) SmpB (PDB accession code 4V8Q) (14) positions a C-terminal  $\alpha$ -helix at the entrance to the mRNA channel and has a globular N domain that binds tmRNA. (C) The C-terminal  $\alpha$ -helix of ArfB (PDB accession code 4V95) (12) occupies the mRNA channel close to the decoding center. The globular N domain has structural homology to domain 3 of RF2 and accommodates into the PTC.



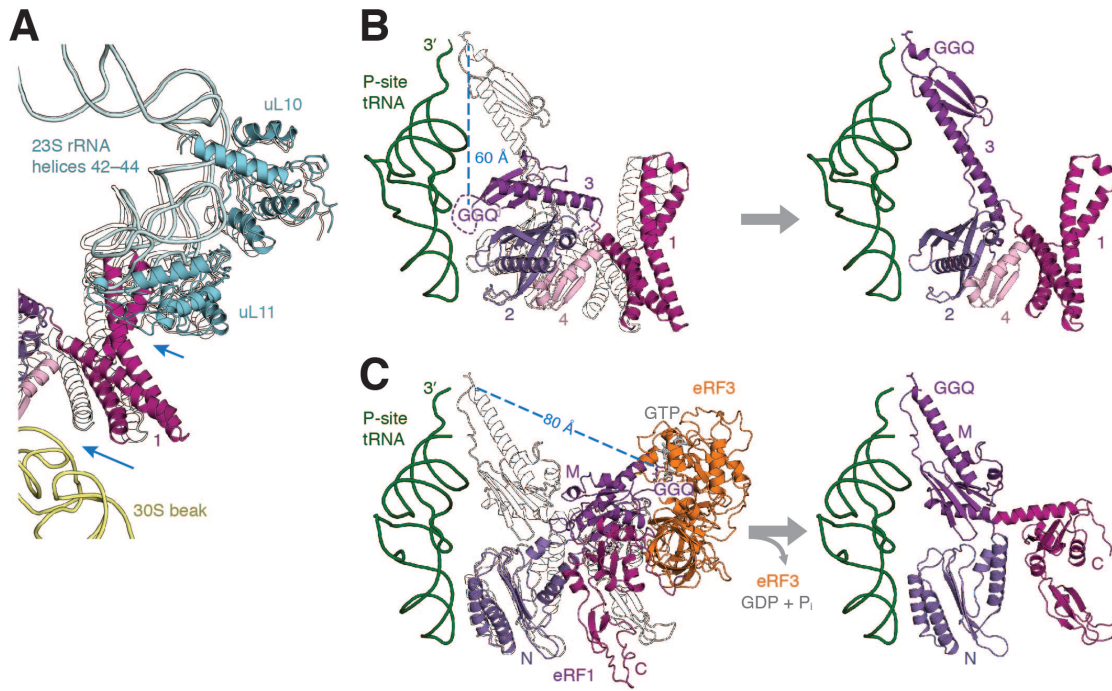

**Fig. S5. Release-factor domain rearrangements.** (A) ArfA-mediated accommodation of RF2 results in an inward movement of domain 1 together with the L7/L12 stalk base (23S rRNA helices 42–44 and the ribosomal proteins uL10 and uL11). This movement brings the three-stranded coiled coil of domain 1 into closer contact with the rRNA of the 30S beak, which may help to stabilize the accommodated state. (B) A superposition of pre-accommodated RF2 with accommodated RF2 (outlined) shows that all four domains move during accommodation. The GGQ loop of domain 3 rises approximately 60 Å to accommodate into the PTC. This movement is associated with a rotation of domains 2 and 4 and an inward movement of domain 1. (C) The conformational changes that RF2 undergoes on ArfA are analogous to those that the structurally unrelated eukaryotic release factor 1 (eRF1) undergoes on a stop codon. eRF1 is delivered to the ribosome in a pre-accommodated conformation by eRF3, a GTP-bound translational GTPase (PDB accession code 5LZT) (28). GTP is hydrolyzed upon stop-codon recognition and eRF3 dissociates from the ribosome. Without its GTPase partner, eRF1 changes conformation and the catalytic GGQ motif of the M domain accommodates into the PTC (PDB accession code 5LZU) (28).

|                                                                   | 70S (empty<br>A site)    | 70S•ArfA•<br>RF2         | 70S•ArfA<br>(A18T)•RF2   | 70S•ArfA•<br>TtRF2       |
|-------------------------------------------------------------------|--------------------------|--------------------------|--------------------------|--------------------------|
| <b>Data Collection</b>                                            |                          |                          |                          |                          |
| Particles                                                         | 140,027                  | 139,792                  | 141,950                  | 54,465                   |
| Pixel size (Å)                                                    | 1.04                     | 1.04                     | 1.04                     | 1.04                     |
| Defocus mean (µm)                                                 | 2.1                      | 2.3                      | 2.4                      | 2.4                      |
| Defocus range (µm)                                                | 0.7–3.9                  | 0.6–4.8                  | 0.5–5.8                  | 1.1–3.9                  |
| Voltage (kV)                                                      | 300                      | 300                      | 300                      | 300                      |
| Electron dose ( $e\cdot\text{Å}^{-2}$ )                           | 48                       | 48                       | 48                       | 48                       |
| <b>Model composition</b>                                          |                          |                          |                          |                          |
| Non-hydrogen atoms                                                | 146,646                  | 149,895                  | 149,614                  | 149,470                  |
| Protein residues                                                  | 5,971                    | 6,379                    | 6,344                    | 6,321                    |
| RNA bases                                                         | 4,628                    | 4,628                    | 4,628                    | 4,628                    |
| Ligands<br>(Zn <sup>2+</sup> /Mg <sup>2+</sup> /H <sub>2</sub> O) | 2/449/2                  | 2/453/2                  | 2/450/2                  | 2/462/3                  |
| <b>Refinement</b>                                                 |                          |                          |                          |                          |
| Resolution (Å)                                                    | 3.10                     | 2.97                     | 3.06                     | 3.35                     |
| Map sharpening B-<br>factor (Å <sup>2</sup> )                     | -79.6                    | -77.0                    | -75.8                    | -91.3                    |
| Average B factor (Å <sup>2</sup> )                                | 95.8                     | 75.3                     | 99.1                     | 85.2                     |
| FSC <sub>average</sub>                                            | 0.89                     | 0.90                     | 0.89                     | 0.85                     |
| CRef (Å)                                                          | 3.1                      | 3.0                      | 3.1                      | 3.4                      |
| <b>Rms deviations</b>                                             |                          |                          |                          |                          |
| Bond lengths (Å)                                                  | 0.006                    | 0.006                    | 0.007                    | 0.006                    |
| Bond angles (°)                                                   | 1.08                     | 1.10                     | 1.16                     | 1.20                     |
| <b>Validation (proteins)</b>                                      |                          |                          |                          |                          |
| MolProbity score<br>(percentile)                                  | 2.0 (99 <sup>th</sup> )  | 2.1 (99 <sup>th</sup> )  | 2.2 (99 <sup>th</sup> )  | 2.4 (98 <sup>th</sup> )  |
| Clashscore, all atoms<br>(percentile)                             | 2.7 (100 <sup>th</sup> ) | 2.8 (100 <sup>th</sup> ) | 3.2 (100 <sup>th</sup> ) | 4.2 (100 <sup>th</sup> ) |
| Good rotamers (%)                                                 | 83.0                     | 82.2                     | 80.9                     | 77.1                     |
| <b>Ramachandran plot</b>                                          |                          |                          |                          |                          |
| Favored (%)                                                       | 94.9                     | 94.7                     | 93.9                     | 93.4                     |
| Outliers (%)                                                      | 0.4                      | 0.4                      | 0.5                      | 0.6                      |
| <b>Validation (RNA)</b>                                           |                          |                          |                          |                          |
| Correct sugar<br>puckers (%)                                      | 97.8                     | 97.9                     | 98.2                     | 97.8                     |
| Good backbone<br>conformations (%)                                | 81.4                     | 81.3                     | 80.8                     | 78.8                     |
| <b>Accession codes</b>                                            |                          |                          |                          |                          |
| EMDB                                                              | EMD-3493                 | EMD-3489                 | EMD-3490                 | EMD-3492                 |
| PDB                                                               | 5MDZ                     | 5MDV                     | 5MDW                     | 5MDY                     |

**Table S1.** Data-collection and model statistics.

## References and Notes

1. K. Ito, Y. Chadani, K. Nakamori, S. Chiba, Y. Akiyama, T. Abo, Nascentome analysis uncovers futile protein synthesis in *Escherichia coli*. *PLOS ONE* **6**, e28413 (2011). [doi:10.1371/journal.pone.0028413](https://doi.org/10.1371/journal.pone.0028413) [Medline](#)
2. K. C. Keiler, Mechanisms of ribosome rescue in bacteria. *Nat. Rev. Microbiol.* **13**, 285–297 (2015). [doi:10.1038/nrmicro3438](https://doi.org/10.1038/nrmicro3438) [Medline](#)
3. E. Giudice, R. Gillet, The task force that rescues stalled ribosomes in bacteria. *Trends Biochem. Sci.* **38**, 403–411 (2013). [doi:10.1016/j.tibs.2013.06.002](https://doi.org/10.1016/j.tibs.2013.06.002) [Medline](#)
4. N. S. Ramadoss, J. N. Alumasa, L. Cheng, Y. Wang, S. Li, B. S. Chambers, H. Chang, A. K. Chatterjee, A. Brinker, I. H. Engels, K. C. Keiler, Small molecule inhibitors of trans-translation have broad-spectrum antibiotic activity. *Proc. Natl. Acad. Sci. U.S.A.* **110**, 10282–10287 (2013). [doi:10.1073/pnas.1302816110](https://doi.org/10.1073/pnas.1302816110) [Medline](#)
5. Y. Chadani, K. Ono, S. Ozawa, Y. Takahashi, K. Takai, H. Nanamiya, Y. Tozawa, K. Kutsukake, T. Abo, Ribosome rescue by *Escherichia coli* ArfA (YhdL) in the absence of trans-translation system. *Mol. Microbiol.* **78**, 796–808 (2010). [doi:10.1111/j.1365-2958.2010.07375.x](https://doi.org/10.1111/j.1365-2958.2010.07375.x) [Medline](#)
6. Y. Komine, M. Kitabatake, T. Yokogawa, K. Nishikawa, H. Inokuchi, A tRNA-like structure is present in 10Sa RNA, a small stable RNA from *Escherichia coli*. *Proc. Natl. Acad. Sci. U.S.A.* **91**, 9223–9227 (1994). [doi:10.1073/pnas.91.20.9223](https://doi.org/10.1073/pnas.91.20.9223) [Medline](#)
7. Y. Chadani, E. Matsumoto, H. Aso, T. Wada, K. Kutsukake, S. Sutou, T. Abo, trans-translation-mediated tight regulation of the expression of the alternative ribosome-rescue factor ArfA in *Escherichia coli*. *Genes Genet. Syst.* **86**, 151–163 (2011). [doi:10.1266/ggs.86.151](https://doi.org/10.1266/ggs.86.151) [Medline](#)
8. F. Garza-Sánchez, R. E. Schaub, B. D. Janssen, C. S. Hayes, tmRNA regulates synthesis of the ArfA ribosome rescue factor. *Mol. Microbiol.* **80**, 1204–1219 (2011). [doi:10.1111/j.1365-2958.2011.07638.x](https://doi.org/10.1111/j.1365-2958.2011.07638.x) [Medline](#)
9. R. E. Schaub, S. J. Poole, F. Garza-Sánchez, S. Benbow, C. S. Hayes, Proteobacterial ArfA peptides are synthesized from non-stop messenger RNAs. *J. Biol. Chem.* **287**, 29765–29775 (2012). [doi:10.1074/jbc.M112.374074](https://doi.org/10.1074/jbc.M112.374074) [Medline](#)
10. Y. Chadani, K. Ito, K. Kutsukake, T. Abo, ArfA recruits release factor 2 to rescue stalled ribosomes by peptidyl-tRNA hydrolysis in *Escherichia coli*. *Mol. Microbiol.* **86**, 37–50 (2012). [doi:10.1111/j.1365-2958.2012.08190.x](https://doi.org/10.1111/j.1365-2958.2012.08190.x) [Medline](#)
11. Y. Shimizu, ArfA recruits RF2 into stalled ribosomes. *J. Mol. Biol.* **423**, 624–631 (2012). [doi:10.1016/j.jmb.2012.08.007](https://doi.org/10.1016/j.jmb.2012.08.007) [Medline](#)
12. M. G. Gagnon, S. V. Seetharaman, D. Bulkley, T. A. Steitz, Structural basis for the rescue of stalled ribosomes: Structure of YaeJ bound to the ribosome. *Science* **335**, 1370–1372 (2012). [doi:10.1126/science.1217443](https://doi.org/10.1126/science.1217443) [Medline](#)
13. D. Kurita, Y. Chadani, A. Muto, T. Abo, H. Himeno, ArfA recognizes the lack of mRNA in the mRNA channel after RF2 binding for ribosome rescue. *Nucleic Acids Res.* **42**, 13339–13352 (2014). [doi:10.1093/nar/gku1069](https://doi.org/10.1093/nar/gku1069) [Medline](#)

14. C. Neubauer, R. Gillet, A. C. Kelley, V. Ramakrishnan, Decoding in the absence of a codon by tmRNA and SmpB in the ribosome. *Science* **335**, 1366–1369 (2012). [doi:10.1126/science.1217039](https://doi.org/10.1126/science.1217039) [Medline](#)
15. F. Zeng, H. Jin, Peptide release promoted by methylated RF2 and ArfA in nonstop translation is achieved by an induced-fit mechanism. *RNA* **22**, 49–60 (2016). [doi:10.1261/rna.053082.115](https://doi.org/10.1261/rna.053082.115) [Medline](#)
16. A. Weixlbaumer *et al.*, Insights into translational termination from the structure of RF2 bound to the ribosome. *Science* **322**, 953–956 (2008). [doi:10.1126/science.1164840](https://doi.org/10.1126/science.1164840) [Medline](#)
17. U. B. S. Rawat, A. V. Zavialov, J. Sengupta, M. Valle, R. A. Grassucci, J. Linde, B. Vestergaard, M. Ehrenberg, J. Frank, A cryo-electron microscopic study of ribosome-bound termination factor RF2. *Nature* **421**, 87–90 (2003). [doi:10.1038/nature01224](https://doi.org/10.1038/nature01224) [Medline](#)
18. B. P. Klaholz, T. Pape, A. V. Zavialov, A. G. Myasnikov, E. V. Orlova, B. Vestergaard, M. Ehrenberg, M. van Heel, Structure of the *Escherichia coli* ribosomal termination complex with release factor 2. *Nature* **421**, 90–94 (2003). [doi:10.1038/nature01225](https://doi.org/10.1038/nature01225) [Medline](#)
19. M. Laurberg, H. Asahara, A. Korostelev, J. Zhu, S. Trakhanov, H. F. Noller, Structural basis for translation termination on the 70S ribosome. *Nature* **454**, 852–857 (2008). [doi:10.1038/nature07115](https://doi.org/10.1038/nature07115) [Medline](#)
20. A. Korostelev, H. Asahara, L. Lancaster, M. Laurberg, A. Hirschi, J. Zhu, S. Trakhanov, W. G. Scott, H. F. Noller, Crystal structure of a translation termination complex formed with release factor RF2. *Proc. Natl. Acad. Sci. U.S.A.* **105**, 19684–19689 (2008). [doi:10.1073/pnas.0810953105](https://doi.org/10.1073/pnas.0810953105) [Medline](#)
21. B. Vestergaard, L. B. Van, G. R. Andersen, J. Nyborg, R. H. Buckingham, M. Kjeldgaard, Bacterial polypeptide release factor RF2 is structurally distinct from eukaryotic eRF1. *Mol. Cell* **8**, 1375–1382 (2001). [doi:10.1016/S1097-2765\(01\)00415-4](https://doi.org/10.1016/S1097-2765(01)00415-4) [Medline](#)
22. D. H. Shin, J. Brandsen, J. Jancarik, H. Yokota, R. Kim, S.-H. Kim, Structural analyses of peptide release factor 1 from *Thermotoga maritima* reveal domain flexibility required for its interaction with the ribosome. *J. Mol. Biol.* **341**, 227–239 (2004). [doi:10.1016/j.jmb.2004.05.055](https://doi.org/10.1016/j.jmb.2004.05.055) [Medline](#)
23. G. Zoldák, L. Redecke, D. I. Svergun, P. V. Konarev, C. S. Voertler, H. Dobbek, E. Sedláč, M. Sprinzl, Release factors 2 from *Escherichia coli* and *Thermus thermophilus*: Structural, spectroscopic and microcalorimetric studies. *Nucleic Acids Res.* **35**, 1343–1353 (2007). [doi:10.1093/nar/gkl696](https://doi.org/10.1093/nar/gkl696) [Medline](#)
24. B. Vestergaard, S. Sanyal, M. Roessle, L. Mora, R. H. Buckingham, J. S. Kastrup, M. Gajhede, D. I. Svergun, M. Ehrenberg, The SAXS solution structure of RF1 differs from its crystal structure and is similar to its ribosome bound cryo-EM structure. *Mol. Cell* **20**, 929–938 (2005). [doi:10.1016/j.molcel.2005.11.022](https://doi.org/10.1016/j.molcel.2005.11.022) [Medline](#)
25. S. L. He, R. Green, Visualization of codon-dependent conformational rearrangements during translation termination. *Nat. Struct. Mol. Biol.* **17**, 465–470 (2010). [doi:10.1038/nsmb.1766](https://doi.org/10.1038/nsmb.1766) [Medline](#)

26. K. Trappl, S. Joseph, Ribosome induces a closed to open conformational change in release factor 1. *J. Mol. Biol.* **428**, 1333–1344 (2016). [doi:10.1016/j.jmb.2016.01.021](https://doi.org/10.1016/j.jmb.2016.01.021) [Medline](#)
27. R. M. Voorhees, V. Ramakrishnan, Structural basis of the translational elongation cycle. *Annu. Rev. Biochem.* **82**, 203–236 (2013). [doi:10.1146/annurev-biochem-113009-092313](https://doi.org/10.1146/annurev-biochem-113009-092313) [Medline](#)
28. S. Shao, J. Murray, A. Brown, J. Taunton, V. Ramakrishnan, R. S. Hegde, Decoding mammalian ribosome-mRNA states by translational GTPase complexes. *Cell* **167**, 1229–1240 (2016). [doi:10.1016/j.cell.2016.10.046](https://doi.org/10.1016/j.cell.2016.10.046)
29. B. Hetrick, K. Lee, S. Joseph, Kinetics of stop codon recognition by release factor 1. *Biochemistry* **48**, 11178–11184 (2009). [doi:10.1021/bi901577d](https://doi.org/10.1021/bi901577d) [Medline](#)
30. D. V. Freistoffer, M. Kwiatkowski, R. H. Buckingham, M. Ehrenberg, The accuracy of codon recognition by polypeptide release factors. *Proc. Natl. Acad. Sci. U.S.A.* **97**, 2046–2051 (2000). [doi:10.1073/pnas.030541097](https://doi.org/10.1073/pnas.030541097) [Medline](#)
31. A. Brown, I. S. Fernández, Y. Gordiyenko, V. Ramakrishnan, Ribosome-dependent activation of stringent control. *Nature* **534**, 277–280 (2016). [Medline](#)
32. Y. Shimizu, A. Inoue, Y. Tomari, T. Suzuki, T. Yokogawa, K. Nishikawa, T. Ueda, Cell-free translation reconstituted with purified components. *Nat. Biotechnol.* **19**, 751–755 (2001). [doi:10.1038/90802](https://doi.org/10.1038/90802) [Medline](#)
33. R. M. Voorhees, A. Weixlbaumer, D. Loakes, A. C. Kelley, V. Ramakrishnan, Insights into substrate stabilization from snapshots of the peptidyl transferase center of the intact 70S ribosome. *Nat. Struct. Mol. Biol.* **16**, 528–533 (2009). [doi:10.1038/nsmb.1577](https://doi.org/10.1038/nsmb.1577) [Medline](#)
34. M. Selmer, C. M. Dunham, F. V. Murphy 4th, A. Weixlbaumer, S. Petry, A. C. Kelley, J. R. Weir, V. Ramakrishnan, Structure of the 70S ribosome complexed with mRNA and tRNA. *Science* **313**, 1935–1942 (2006). [doi:10.1126/science.1131127](https://doi.org/10.1126/science.1131127) [Medline](#)
35. X. Li, P. Mooney, S. Zheng, C. R. Booth, M. B. Braunfeld, S. Gubbens, D. A. Agard, Y. Cheng, Electron counting and beam-induced motion correction enable near-atomic-resolution single-particle cryo-EM. *Nat. Methods* **10**, 584–590 (2013). [doi:10.1038/nmeth.2472](https://doi.org/10.1038/nmeth.2472) [Medline](#)
36. K. Zhang, Gctf: Real-time CTF determination and correction. *J. Struct. Biol.* **193**, 1–12 (2016). [doi:10.1016/j.jsb.2015.11.003](https://doi.org/10.1016/j.jsb.2015.11.003) [Medline](#)
37. R. Fernandez-Leiro, S. Scheres, A pipeline approach to single-particle processing in RELION. *bioRxiv* (2016). [10.1101/078352](https://doi.org/10.1101/078352)
38. S. H. W. Scheres, Semi-automated selection of cryo-EM particles in RELION-1.3. *J. Struct. Biol.* **189**, 114–122 (2015). [doi:10.1016/j.jsb.2014.11.010](https://doi.org/10.1016/j.jsb.2014.11.010) [Medline](#)
39. X.-C. Bai, E. Rajendra, G. Yang, Y. Shi, S. H. Scheres, Sampling the conformational space of the catalytic subunit of human  $\gamma$ -secretase. *eLife* **4**, 1485 (2015). [doi:10.7554/eLife.11182](https://doi.org/10.7554/eLife.11182)
40. P. B. Rosenthal, R. Henderson, Optimal determination of particle orientation, absolute hand, and contrast loss in single-particle electron cryomicroscopy. *J. Mol. Biol.* **333**, 721–745 (2003). [doi:10.1016/j.jmb.2003.07.013](https://doi.org/10.1016/j.jmb.2003.07.013) [Medline](#)

41. S. Chen, G. McMullan, A. R. Faruqi, G. N. Murshudov, J. M. Short, S. H. W. Scheres, R. Henderson, High-resolution noise substitution to measure overfitting and validate resolution in 3D structure determination by single particle electron cryomicroscopy. *Ultramicroscopy* **135**, 24–35 (2013). [doi:10.1016/j.ultramic.2013.06.004](https://doi.org/10.1016/j.ultramic.2013.06.004) [Medline](#)
42. A. Kucukelbir, F. J. Sigworth, H. D. Tagare, Quantifying the local resolution of cryo-EM density maps. *Nat. Methods* **11**, 63–65 (2014). [doi:10.1038/nmeth.2727](https://doi.org/10.1038/nmeth.2727) [Medline](#)
43. E. F. Pettersen, T. D. Goddard, C. C. Huang, G. S. Couch, D. M. Greenblatt, E. C. Meng, T. E. Ferrin, UCSF Chimera—A visualization system for exploratory research and analysis. *J. Comput. Chem.* **25**, 1605–1612 (2004). [doi:10.1002/jcc.20084](https://doi.org/10.1002/jcc.20084) [Medline](#)
44. P. Emsley, B. Lohkamp, W. G. Scott, K. Cowtan, Features and development of *Coot*. *Acta Crystallogr. D* **66**, 486–501 (2010). [doi:10.1107/S0907444910007493](https://doi.org/10.1107/S0907444910007493) [Medline](#)
45. A. Brown, F. Long, R. A. Nicholls, J. Toots, P. Emsley, G. Murshudov, Tools for macromolecular model building and refinement into electron cryo-microscopy reconstructions. *Acta Crystallogr. D* **71**, 136–153 (2015). [doi:10.1107/S1399004714021683](https://doi.org/10.1107/S1399004714021683) [Medline](#)
46. V. B. Chen, W. B. Arendall III, J. J. Headd, D. A. Keedy, R. M. Immormino, G. J. Kapral, L. W. Murray, J. S. Richardson, D. C. Richardson, MolProbity: All-atom structure validation for macromolecular crystallography. *Acta Crystallogr. D* **66**, 12–21 (2010). [doi:10.1107/S0907444909042073](https://doi.org/10.1107/S0907444909042073) [Medline](#)
47. W. L. DeLano, The PyMOL molecular graphics system (2002).
48. UniProt Consortium, UniProt: A hub for protein information. *Nucleic Acids Res.* **43**, D204–D212 (2015). [doi:10.1093/nar/gku989](https://doi.org/10.1093/nar/gku989) [Medline](#)
49. R. C. Edgar, MUSCLE: Multiple sequence alignment with high accuracy and high throughput. *Nucleic Acids Res.* **32**, 1792–1797 (2004). [doi:10.1093/nar/gkh340](https://doi.org/10.1093/nar/gkh340) [Medline](#)
50. A. M. Waterhouse, J. B. Procter, D. M. A. Martin, M. Clamp, G. J. Barton, Jalview version 2—A multiple sequence alignment editor and analysis workbench. *Bioinformatics* **25**, 1189–1191 (2009). [Medline](#)
